# Supplementary material for: Comparison of protein expression between formalin-fixed core-cut biopsies and surgical excision specimens using a novel multiplex approach
Source: Springer Nature journal article supplement (doi:10.1007/s10549-019-05163-6), 2019-02-21
Supplement: MOESM1 [file 16501138]

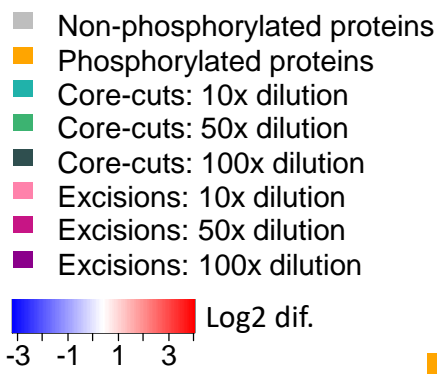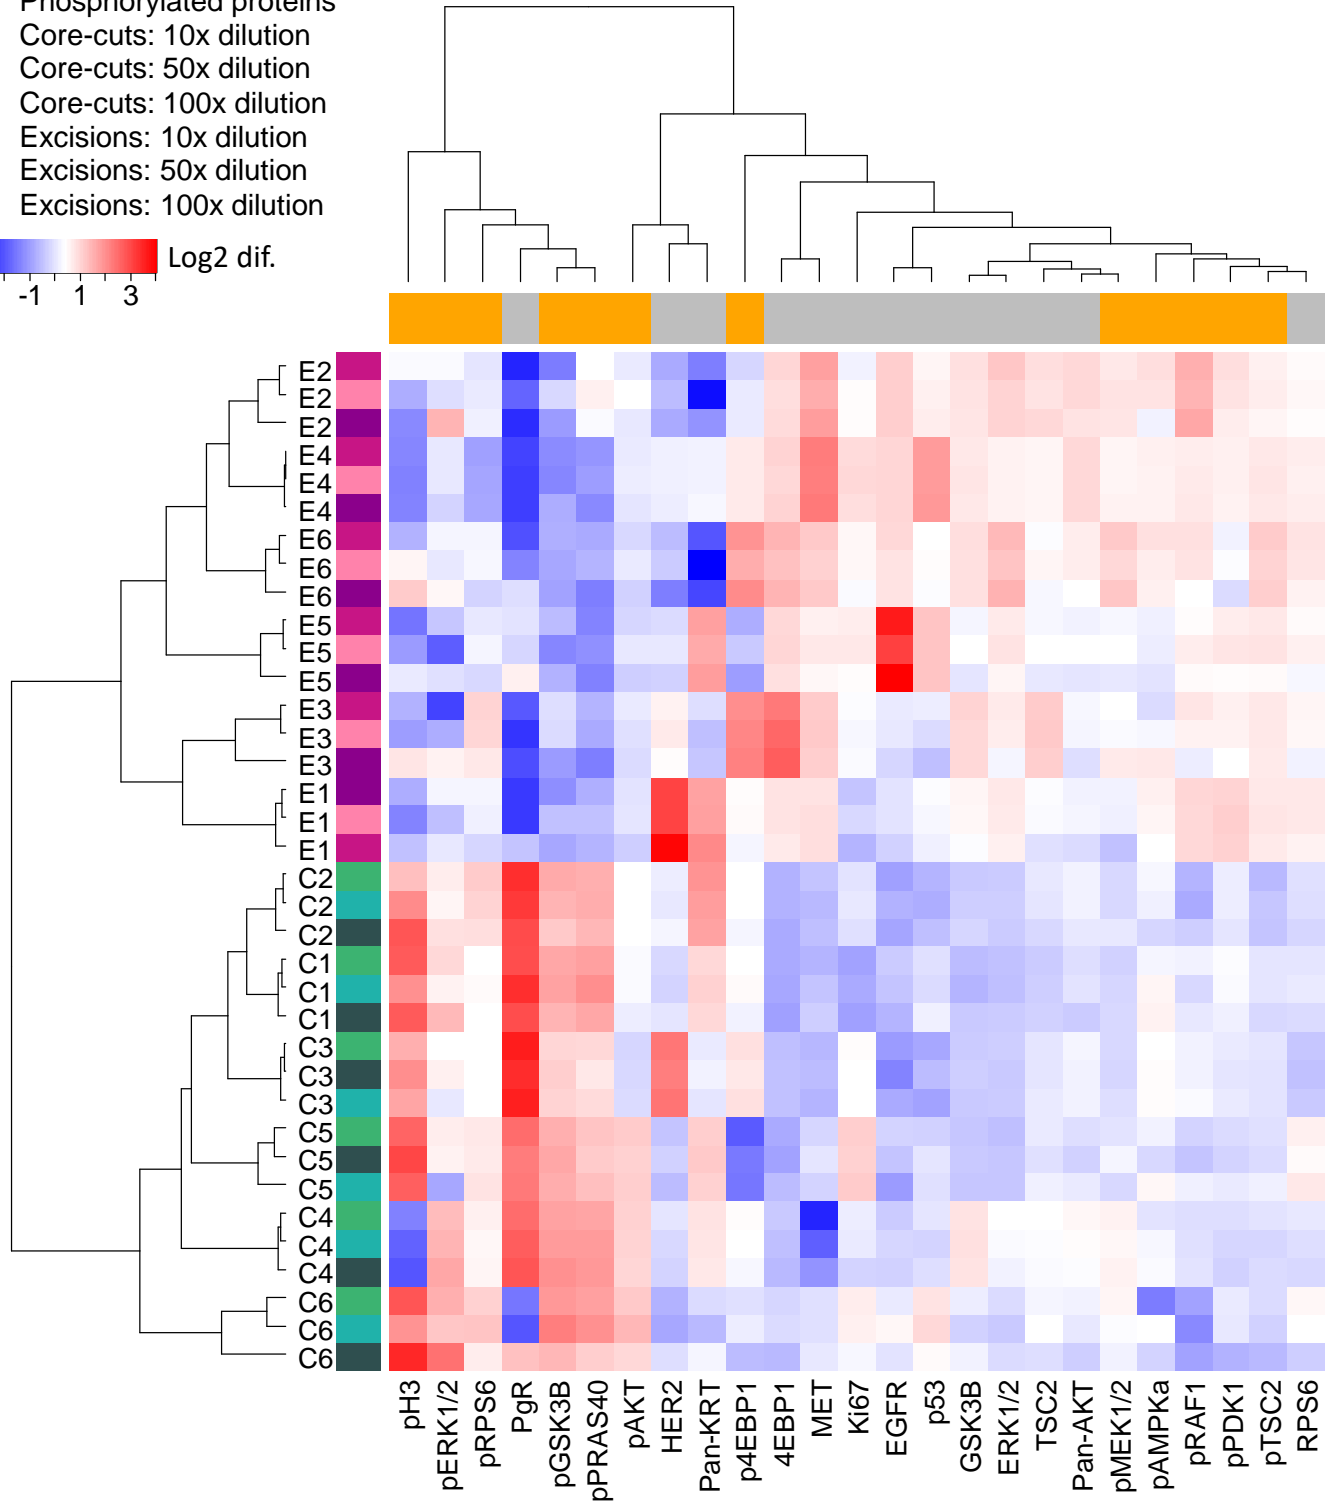

**Supplementary figure 1.** Heatmap based on Spearman Correlation test. Columns values were scaled by log2 difference in relation to the mean of each protein. Grey: non-phosphorylated proteins; orange: phosphorylated proteins; Pink/Purple: Core-cuts; Green: Mastectomy; C: core-cuts; E: surgical excisions. In sample bar legends, 10x dilution of cleaved tags is shown as light colours, 50x as medium colours and 100x as dark colours.

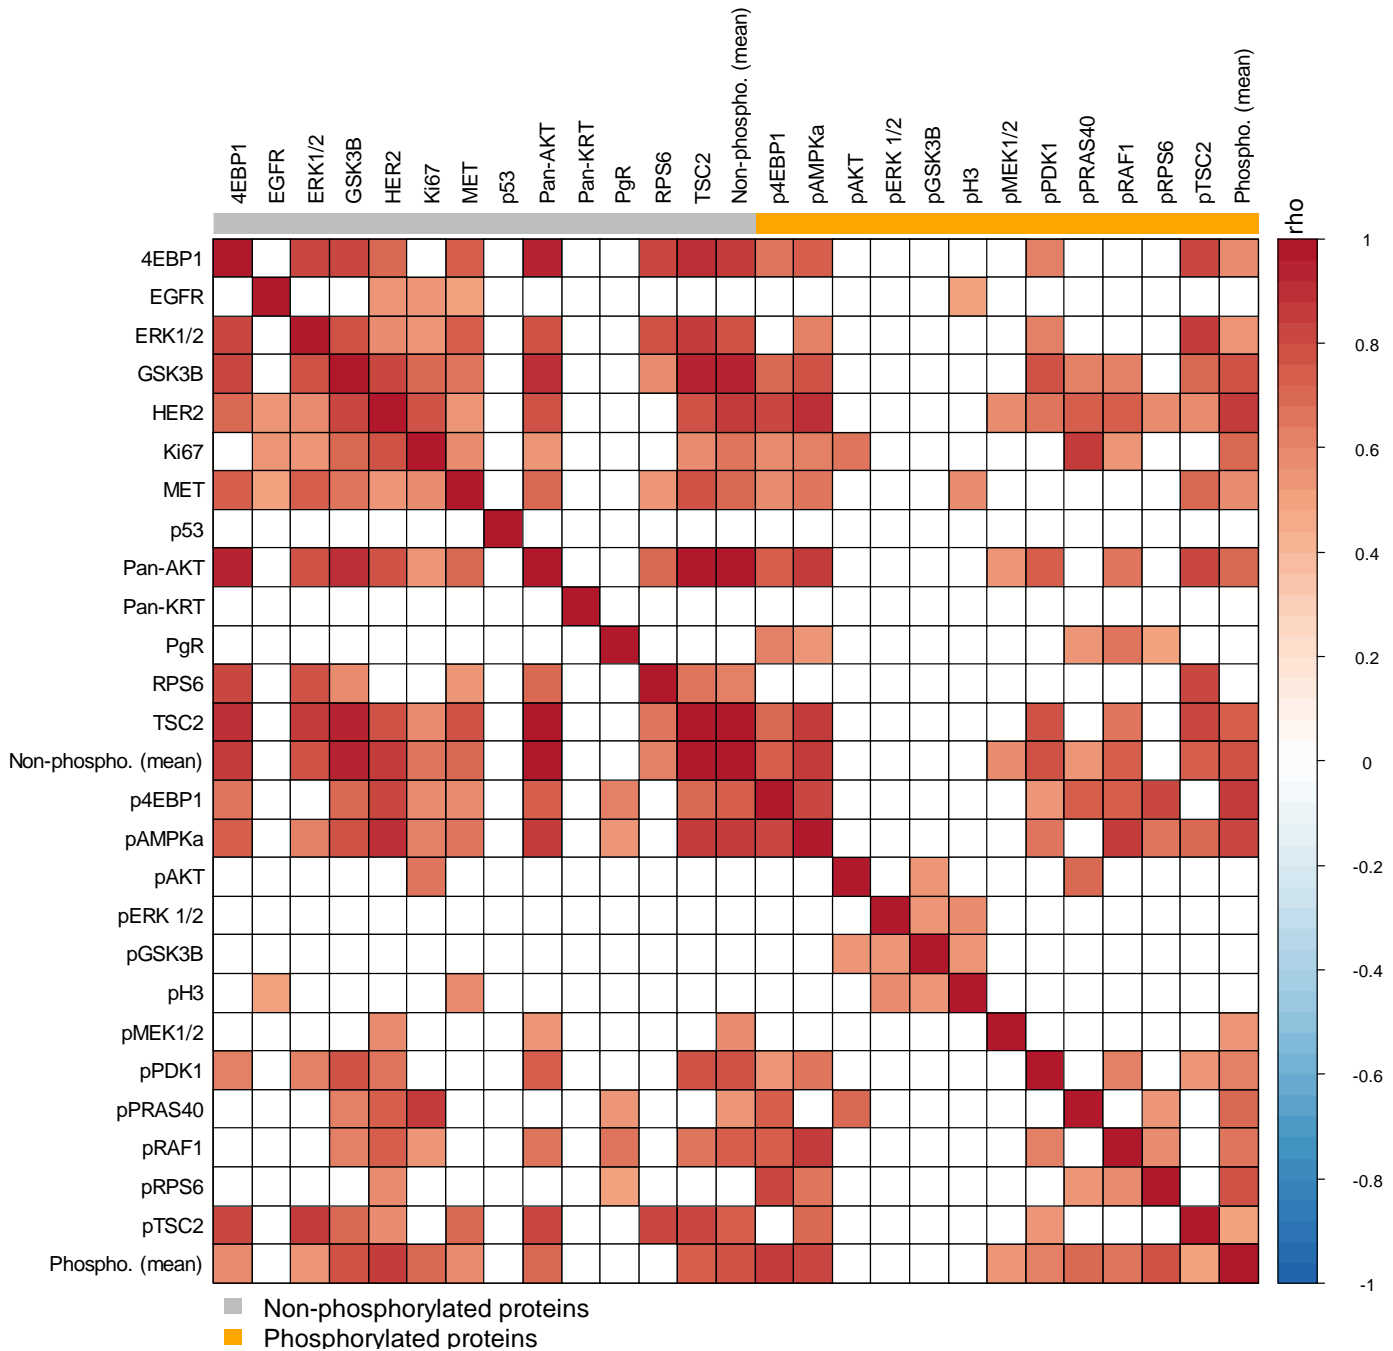

**Supplementary figure 2.** Correlation matrix of difference of 25 proteins between core-cuts and surgical excisions. Red and blue bar: rho coefficient of spearman correlation test. Grey: non-phosphorylated proteins; Orange: phosphorylated proteins. Blank cells: non-significant correlation (p>0.05).

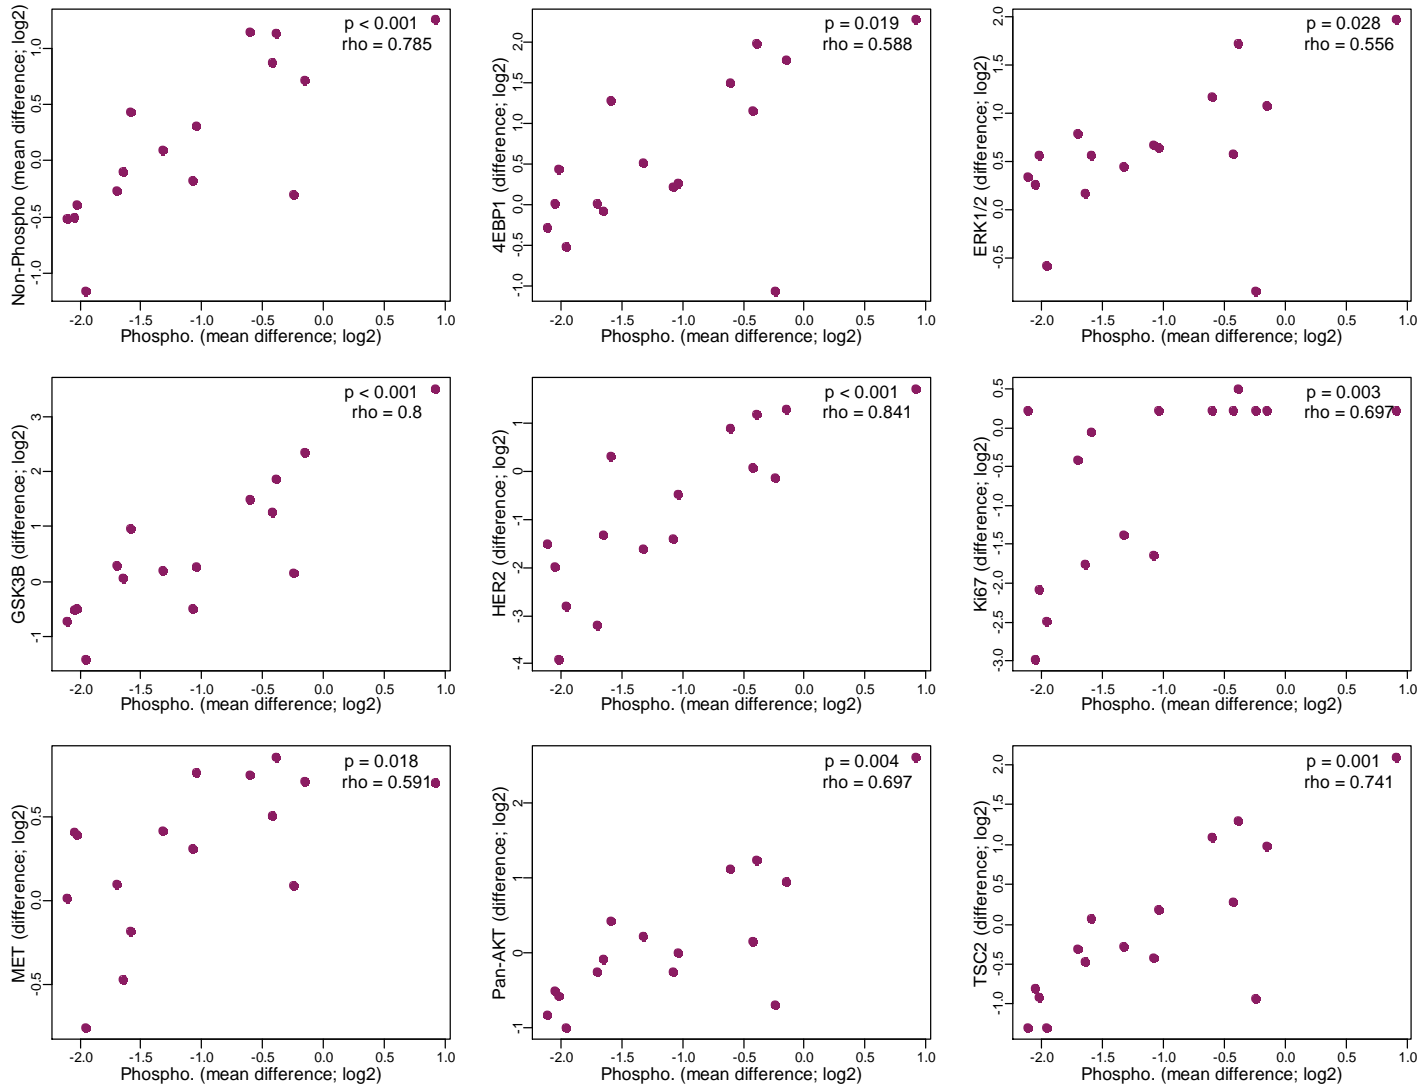

**Supplementary figure 3.** Correlation between the difference of the overall mean of phosphorylated proteins and the non-phosphorylated proteins between paired core-cuts and surgical excisions. rho: coefficient of spearman correlation test.
