# Supplementary material for: Comparison of protein expression between formalin-fixed core-cut biopsies and surgical excision specimens using a novel multiplex approach
Source: Springer Nature journal article supplement (doi:10.1007/s10549-019-05163-6), 2019-02-21
Supplement: MOESM2 [file 16501138]

**Supplemental table 1.** Studied proteins of nCounter® Vantage 3D™ Protein Solid Tumor Panel for FFPE

|          | Protein name                                                  | Symbol   | Clone Name | Phosphosite   | Driver protein | Main pathways |      |      |      |     |            |
|----------|---------------------------------------------------------------|----------|------------|---------------|----------------|---------------|------|------|------|-----|------------|
|          |                                                               |          |            |               |                | Wnt           | TGFB | MAPK | PI3K | RAS | Cell Cycle |
| Targets  | 3-phosphoinositide-dependent protein kinase 1                 | PDPK1    | C49H2      | Ser241        |                |               |      |      | +    |     |            |
|          | Cellular tumor antigen p53                                    | p53      | DO-7       | N/A           | +              | +             |      | +    | +    |     | +          |
|          | Dual specificity mitogen-activated protein kinase kinase 1/2  | pMEK1/2  | 41G9       | Ser217/221    | +              |               |      | +    | +    | +   |            |
|          | Epidermal growth factor receptor                              | EGFR     | D38B1      | N/A           | +              |               |      | +    | +    | +   |            |
|          | Epidermal growth factor receptor                              | pEGFR    | D7A5       | Tyr1068       | +              |               |      | +    | +    | +   |            |
|          | Eukaryotic translation initiation factor 4E-binding protein 1 | 4EBP1    | 53H11      | N/A           |                |               |      |      | +    |     |            |
|          | Eukaryotic translation initiation factor 4E-binding protein 1 | p4EBP1   | 236B4      | Thr37/46      |                |               |      |      | +    |     |            |
|          | Glycogen synthase kinase-3 beta                               | GSK3B    | D5C5Z      | N/A           |                | +             |      |      | +    |     | +          |
|          | Glycogen synthase kinase-3 beta                               | pGSK3B   | D85E12     | Ser9          |                | +             |      |      | +    |     | +          |
|          | Hepatocyte growth factor receptor                             | MET      | D1C2       | N/A           | +              |               |      |      | +    | +   |            |
|          | Histone H3                                                    | pH3      | D2C8       | Ser10         |                |               |      |      |      |     | +          |
|          | Keratin                                                       | Pan-KRT  | C11        | N/A           |                |               |      |      | +    |     |            |
|          | Mitogen-activated protein kinase 1/3                          | EKR1/2   | 137F5      | N/A           |                |               |      | +    | +    | +   | +          |
|          | Mitogen-activated protein kinase 1/3                          | pERK1/2  | D13.14.4E  | Thr202/Tyr204 |                |               |      | +    | +    | +   | +          |
|          | Non-specific serine/threonine protein kinase                  | pAMPKa   | 40H9       | Thr172        |                |               |      |      | +    |     |            |
|          | Progesterone Receptor                                         | PgR      | YR85       | N/A           | +              |               |      |      |      |     |            |
|          | Proliferation marker protein Ki-67                            | Ki67     | 8D5        | N/A           |                |               |      |      |      |     | +          |
|          | Proline-rich AKT1 substrate 1                                 | pPRAS40  | D4D2       | Thr246        |                |               |      |      | +    |     |            |
|          | RAC serine/threonine-protein kinase                           | Pan-AKT  | C67E7      | N/A           | +              |               |      |      | +    | +   | +          |
|          | RAC serine/threonine-protein kinase                           | pAKT     | D9E        | Ser473        | +              |               |      |      | +    | +   | +          |
|          | RAF proto-oncogene serine/threonine-protein kinase            | pRAF1    | Polyclonal | Ser259        |                |               |      |      | +    | +   | +          |
|          | Receptor tyrosine-protein kinase erbB-2                       | ERBB2*   | 29D8       | N/A           | +              |               |      |      | +    | +   | +          |
|          | S6 Ribosomal Protein                                          | RPS6     | 54D2       | N/A           |                |               |      |      | +    |     |            |
|          | S6 Ribosomal Protein                                          | pRPS6    | D57.2.2E   | Ser235/236    |                |               |      |      | +    |     |            |
| Tuberin  | TSC2                                                          | D93F12   | N/A        |               |                |               |      | +    |      |     |            |
| Tuberin  | pTSC2                                                         | 5B12     | Thr1462    |               |                |               |      | +    |      |     |            |
| Controls | Histone H3                                                    | HIST1H3A | D1H2       | N/A           |                |               |      |      |      |     |            |
|          | Mouse Immunoglobulin G                                        | IgG      | MOPC-21    | N/A           |                |               |      |      |      |     |            |
|          | Rabbit Immunoglobulin G                                       | IgG      | DA1E       | N/A           |                |               |      |      |      |     |            |

\*HER2; N/A: not applied.
